# Supplementary material
Source: PubMed Central journal article supplement (PMC7082109)
Supplement: supp_8.1.E156_2019-0199-1-at.pdf [file supp_8.1.E156_2019-0199-1-at.pdf]

**Appendix 1 (as supplied by the authors): Codes used for identification of events and procedures**

| <b>Diagnosis</b>          | <b>ICD-9 Code (prior to 2002)</b> | <b>ICD-10-CA Code (2002 and later)</b> |
|---------------------------|-----------------------------------|----------------------------------------|
| Acute ischemic stroke     | 362.3, 434, 436                   | I63 (excluding I63.6), I64, H34.1      |
| Acute hemorrhagic stroke  | 430, 431                          | I60, I61                               |
| Transient ischemic attack | 435                               | G45 (excluding G45.4), H34.0           |

| <b>Procedure</b>                                        | <b>Variable or Code</b>                                                                                                                                  |
|---------------------------------------------------------|----------------------------------------------------------------------------------------------------------------------------------------------------------|
| Computed Tomography/Magnetic Resonance Imaging scan     | Discharge Abstract Database or National Ambulatory Care Reporting System special project field 340 where SCAN = 'Y' or 'P' (yes or prior) (from 2012/13) |
| Thrombolysis                                            | Discharge Abstract Database or National Ambulatory Care Reporting System special project field 340 where THROMBOLYSIS = 'Y' (from 2012/13)               |
| Carotid revascularization (endarterectomy and stenting) | Canadian Classification of Interventions codes: 1JE50, 1JE57, 1JE87<br><br>Physician billing code : R792                                                 |
