# Supplementary material
Source: PubMed Central journal article supplement (PMC7082109)
Supplement: supp_8.1.E156_2019-0199-original-submission.pdf [file supp_8.1.E156_2019-0199-original-submission.pdf]

1  
2  
3 **Stroke Incidence, Care, and Outcomes in First Nations People with Diabetes in Ontario,**  
4  
5  
6 **Canada: A Population-Based Cohort Study**  
7  
8  
9

10  
11 Moira K. Kapral, MD MSc<sup>1,2</sup>, Baiju R. Shah, MD PhD<sup>1,2</sup>, Michael E. Green, MD MPH<sup>3,4</sup>, Joan  
12  
13 Porter, PhD<sup>2</sup>, Rebecca Griffiths, BSc<sup>4</sup>, Eliot Frymire, MA<sup>3,4</sup>, Morgan Slater PhD<sup>3,4</sup>, Kristen Jacklin  
14  
15  
16 PhD<sup>5</sup>, Roseanne Sutherland<sup>6</sup>, Jennifer D. Walker PhD<sup>2,7</sup>  
17  
18  
19  
20

21 **Affiliations:**

22  
23  
24 <sup>1</sup>Department of Medicine, University of Toronto, Canada;

25 <sup>2</sup>ICES, Toronto, Canada;

26 <sup>3</sup>Department of Family Medicine, Queen's University, Kingston, Canada;

27 <sup>4</sup>ICES Queen's, Kingston, Canada;

28  
29 <sup>5</sup>Memory Keepers Medical Discovery Team, Department of Family Medicine and Biobehavioral  
30 Health, University of Minnesota Medical School Duluth, Minnesota, USA;

31 <sup>6</sup>Chiefs of Ontario, Canada;

32 <sup>7</sup>School of Rural and Northern Health, Laurentian University, Canada  
33  
34  
35  
36

37 Correspondance:

38 Moira K. Kapral

39 email: [moira.kapral@uhn.ca](mailto:moira.kapral@uhn.ca)  
40  
41

42 **Funding:** Moira Kapral was supported by a Mid-Career Award from the Heart and Stroke  
43 Foundation of Canada, Michael Green by the Brian Hennen Chair in Family Medicine, Morgan  
44 Slater by a Health System Impact Fellowship from the Canadian Institutes of Health Research,  
45 and Jennifer Walker by a Tier 2 Canada Research Chair in Indigenous Health. Funding is  
46 provided by the Ontario SPOR SUPPORT Unit, which is supported by the Canadian Institutes of  
47 Health Research and the Province of Ontario.. This study was supported by ICES, which is  
48 funded by an annual grant from the Ontario Ministry of Health and Long-Term Care (MOHLTC).  
49  
50  
51  
52

53 **Competing interests:** All authors have no competing interests to declare  
54  
55

56 Abstract word count: 242  
57  
58  
59  
60

1  
2  
3 Text word count: 2206  
4

5  
6 **Abstract**  
7

8 **Background:** First Nations people have high rates of diabetes, which is a risk factor for stroke.  
9

10 We studied the incidence, care, and outcomes of stroke and transient ischemic attack (TIA) in  
11  
12 First Nations people in Ontario.  
13

14  
15 **Methods:** Using linked, de-identified databases housed at ICES, we identified a cohort of people  
16  
17 with prevalent diabetes between April 1, 1995 and March 31, 2015, and identified Status First  
18  
19 Nations people from the Indian Register. We compared age-/sex-standardized stroke/TIA  
20  
21 hospitalization rates, processes of care, and case-fatality in First Nations versus other Ontarians  
22  
23 with diabetes.  
24  
25

26  
27 **Results:** Hospitalization rates for stroke/TIA declined over the study period, but were higher in  
28  
29 First Nations people than other Ontarians in every year after 2006. Compared to other  
30  
31 Ontarians, First Nations people hospitalized with stroke/TIA were equally likely to undergo  
32  
33 neuroimaging within 24 hours (94.6% vs. 96.0%) and be discharged to inpatient rehabilitation  
34  
35 (31.8% vs. 34.8%) but less likely to receive thrombolysis (6.3% vs. 11.0%) or carotid  
36  
37 revascularization (1.4% vs. 2.7%). There was a trend toward increased age-/sex-standardized  
38  
39 stroke case-fatality in First Nations people compared to other Ontarians at seven days (12% vs.  
40  
41 8.4%), 30 days (19.2% vs. 15.9%) and one year (33.8% vs. 28.0%).  
42  
43  
44

45  
46  
47 **Interpretation:** Stroke incidence and case-fatality are higher in First Nations people compared  
48  
49 to other people with diabetes. Future work should focus on determining Indigenous-specific  
50  
51 determinants of health related to this disparity and implementing appropriate interventions to  
52  
53 mitigate the risks and sequelae of stroke in First Nations people.  
54  
55  
56

1  
2  
3 **Background:** Stroke is a leading cause of death and disability in Canada and worldwide<sup>1</sup>.

4  
5  
6 Diabetes mellitus is a risk factor for stroke, and is also associated with an increased prevalence  
7  
8 of other vascular risk factors including hypertension and hyperlipidemia<sup>2-5</sup>. Stroke incidence is  
9  
10 higher in Indigenous compared to non-Indigenous populations in Australia, and, in Canada,  
11  
12 diabetes mellitus occurs with a higher frequency and at an earlier age in First Nations people  
13  
14 than in the general population<sup>6-9</sup>. These increased risks are the result of a complex set of  
15  
16 determinants of health including contemporary and historic influences of colonization and  
17  
18 marginalization experienced by First Nations people<sup>10</sup>.

19  
20  
21  
22  
23  
24  
25 In the setting of acute stroke, interventions such as thrombolysis, mechanical thrombectomy,  
26  
27 stroke unit care, and rehabilitation are associated with improved functional outcomes, while  
28  
29 antithrombotic therapy, treatment of hyperlipidemia and hypertension, and carotid  
30  
31 revascularization can decrease the risk of recurrent stroke and vascular death<sup>11,12</sup>. However,  
32  
33 many of these interventions require specialized stroke care resources that may not be available  
34  
35 in all jurisdictions. First Nations people are more likely to live outside of urban settings where  
36  
37 these services are most readily accessed.<sup>13</sup>

38  
39  
40  
41  
42  
43  
44 Among First Nations people with diabetes, little is known about the risks and outcomes of  
45  
46 stroke and this information gap is of critical importance to First Nations leadership and health  
47  
48 providers who are faced with high rates of diabetes in their populations. In collaboration with  
49  
50 the Chiefs of Ontario, we used linked population-based administrative databases from the  
51  
52  
53  
54  
55  
56  
57  
58  
59  
60

1  
2  
3 province of Ontario, Canada, to study stroke incidence, process of acute stroke care, and stroke  
4  
5 case-fatality in First Nations people compared to other Ontarians with diabetes.  
6  
7  
8  
9

## 10 **Methods**

### 11 ***Data Sources and Study Cohort:***

12  
13 We used the study cohort of First Nations people and other Ontarians with diabetes described  
14  
15 in the Methods paper by Slater et al<sup>13</sup>. Briefly, annual cohorts of Ontario residents with  
16  
17 prevalent diabetes between April 1, 1995 and March 31, 2015 were identified from the  
18  
19 Registered Persons Database linked with the Ontario Diabetes Database, and First Nations  
20  
21 people were identified from the Indian Register. We then used the Discharge Abstract Database  
22  
23 (DAD) maintained by the Canadian Institute for Health Information (CIHI) to identify  
24  
25 hospitalizations for stroke or transient ischemic attack in each fiscal year ending March 31,  
26  
27 2016, using validated International Classification of Diseases, 9<sup>th</sup> revision (ICD-9) and 10<sup>th</sup>  
28  
29 revision, Canada (ICD-10-CA) diagnosis codes<sup>14,15</sup>. These datasets were linked using unique  
30  
31 encoded identifiers and analyzed at ICES. If an individual had more than one stroke or TIA  
32  
33 hospitalization in a fiscal year (April 1 – March 31), only the first event was kept for analysis. We  
34  
35 excluded records where the stroke or TIA diagnosis was flagged as questionable, as well as  
36  
37 persons younger than 20 years or older than 105 years as of March 31 of the year of their  
38  
39 stroke.  
40  
41  
42  
43  
44  
45  
46  
47  
48

### 49 ***Incident Stroke:***

50  
51 We calculated the crude rate of hospitalization for stroke or TIA in First Nations people (living in  
52  
53 First Nations communities and outside of First Nation communities) and other people in  
54  
55  
56  
57  
58  
59  
60

1  
2  
3 Ontario and stratified by sex and age group ( $\leq 30$  years, 30-49, 50-79 and 80 years and older).

4  
5 For First Nations people and other people in Ontario, we also calculated direct age- and sex-  
6  
7 standardized rates and 95% confidence intervals (CI) of stroke or TIA hospitalization per  
8  
9 100,000 people with diabetes using the 2001 Ontario population 20 years and older with  
10  
11 diabetes as the standard population. Standardized rates were calculated for 5 one-year time  
12  
13 periods: 1996, 2002, 2006, 2011 and 2015.  
14  
15  
16

17  
18 ***Processes of Stroke Care and Outcomes:***

19  
20 We studied the following processes of stroke care and outcomes: (1) computed tomography  
21  
22 (CT) or magnetic resonance imaging (MRI) scan within 24 hours of arrival at hospital in those  
23  
24 with acute stroke or TIA; (2) thrombolytic therapy for ischemic stroke; (3) carotid  
25  
26 revascularization (endarterectomy or stenting) within 90 days of admission for ischemic stroke;  
27  
28 (4) discharge to home, inpatient rehabilitation, or long-term care following ischemic or  
29  
30 hemorrhagic stroke hospitalization; and (5) mortality at 7-days, 30-days or 1 year following  
31  
32 ischemic or hemorrhagic stroke hospitalization. Outcome rates were age- and sex-standardized  
33  
34 to the 2001 Ontario population 20 years and older with diabetes. Only the first stroke or TIA  
35  
36 event an individual had over the 5-year observation period was kept for analysis.  
37  
38  
39  
40  
41  
42  
43  
44

45 We determined whether a patient had received a CT or MRI scan or thrombolysis from the DAD  
46  
47 using a special project field that captures process measures specific to stroke and TIA. We  
48  
49 determined rates of carotid revascularization using Canadian Classification of Intervention (CCI)  
50  
51 codes in the DAD and allowing for 90-days of follow-up after stroke. We determined rates of  
52  
53  
54  
55  
56  
57  
58  
59  
60

1  
2  
3 discharge to home, rehabilitation or long-term care from the discharge disposition and the type  
4  
5 of institution the individual was discharged to, if not discharged home.  
6  
7  
8  
9

10 Seven-day, 30-day and 1-year mortality rates were determined for strokes occurring between  
11  
12 April 1, 2011 and March 31, 2016. We used the Registered Persons Database (RPDB), a  
13  
14 repository of demographic information about all persons in Ontario with a health card number,  
15  
16 to determine a person's date of death, if applicable. Survival time was calculated as the  
17  
18 difference between date of death and the date of admission to hospital.  
19  
20  
21  
22

### 23 ***Ethics:***

24  
25 This work was undertaken as a collaboration between First Nations and academic researchers,  
26  
27 and was guided by the First Nations principles of ownership, control, access and possession<sup>16</sup>. In  
28  
29 addition to approval by the Chiefs of Ontario Data Governance Committee, the project was  
30  
31 reviewed and approved by the Research Ethics Boards of Queen's University and Laurentian  
32  
33 University.  
34  
35  
36  
37  
38  
39

### 40 **Results:**

41  
42 Hospitalization rates for stroke and TIA among all people with diabetes in Ontario declined  
43  
44 between 1996 and 2015, from 1,708 to 714/100,000 First Nations people and from 1,395 to  
45  
46 517/100,000 other Ontarians (Figure 1). However, the rate of decline was less pronounced in  
47  
48 First Nations people compared to other Ontarians such that stroke/TIA hospitalization rates  
49  
50 were higher in First Nations people than in other Ontarians in every year after 2006 (Figure 1).  
51  
52  
53  
54 The increased hospitalization rates in First Nations people were particularly marked in those  
55  
56  
57  
58  
59  
60

1  
2  
3 aged under 64 years, with hospitalization rate for those aged 50-64 years 776.4/100,000 First  
4  
5 Nations vs. 281.8/100,000 other Ontarians (Figure 2).  
6  
7  
8  
9

10 Overall, 28,874 people with diabetes were hospitalized with a stroke or TIA between April 1,  
11  
12 2011 and March 31, 2016, 536 of whom were First Nations people. Compared to other  
13  
14 Ontarians with diabetes and stroke/TIA, First Nations people were younger (median age 63 vs.  
15  
16 74 years), more likely to be female (53.5% vs. 46.8%) and more likely to live in rural areas  
17  
18 (33.4% vs. 9.5%) (standardized difference of the mean > 0.10 for all comparisons; Table 1). First  
19  
20 Nations people with stroke/TIA were as likely as other Ontarians to undergo neuroimaging  
21  
22 within 24 hours of hospital arrival (94.6% vs. 96.0%), to be discharged to inpatient rehabilitation  
23  
24 (31.8% vs. 34.8), and to undergo carotid revascularization for ischemic stroke or TIA (1.4% vs.  
25  
26 2.7%), but were less likely to receive thrombolysis for ischemic stroke (6.3% vs. 11%) (Figure 3).  
27  
28 Point estimates for age-/sex-standardized stroke case-fatality were higher in First Nations  
29  
30 people than in other Ontarians at seven days (12% vs. 8.4%), 30 days (19.2% vs. 15.9%) and one  
31  
32 year (33.8% vs. 28.0%), although the confidence intervals overlapped for all estimates (Figure  
33  
34 4a). In analyses of one-year mortality stratified by age, the point estimates for mortality rates  
35  
36 for First Nations people were higher than for other Ontarians among those aged 30 to 49 years  
37  
38 (28.6% vs. 14.9%) and aged 50 to 64 years (27.4% vs. 21.1%), although the confidence intervals  
39  
40 for these estimates again overlapped (Figure 4b). One-year post-stroke mortality rates were  
41  
42 similar for First Nations and other people in Ontario among those aged over 65 years.  
43  
44  
45  
46  
47  
48  
49  
50  
51  
52  
53

#### 54 **Discussion:**

55  
56  
57  
58  
59  
60

1  
2  
3 In this population-based study of people with diabetes in the province of Ontario, Canada, we  
4  
5 found that overall hospitalization rates for stroke or TIA declined between 1996 and 2015,  
6  
7 however, this decline was less marked in First Nations people than in other Ontarians. After  
8  
9 2006, hospitalization rates for stroke/TIA were higher for First Nations people than other  
10  
11 Ontarians, and this appeared to be mainly attributable to increased rates in those aged under  
12  
13 65 years. Compared to other Ontarians with diabetes and acute stroke, First Nations people  
14  
15 were younger, more likely to live in rural areas, and more likely to be female, had similar use of  
16  
17 brain imaging, inpatient rehabilitation, and carotid revascularization, and were less likely to be  
18  
19 treated with thrombolysis. There was a trend toward higher stroke case-fatality in First Nations  
20  
21 people compared to other Ontarians, and, for one-year mortality, this was mainly driven by  
22  
23 higher mortality for First Nations people aged under 65 years.  
24  
25  
26  
27  
28  
29  
30  
31

32 The finding of temporal declines in stroke incidence has been seen in other studies from other  
33  
34 high-income countries<sup>17</sup>. However, these declines are not consistent across regions and groups  
35  
36 of patients, and stroke incidence has been increasing in low- and middle-income countries and  
37  
38 in younger people in high-income countries<sup>18,19</sup>. Regional variations in stroke incidence are  
39  
40 generally attributed to differences in the prevalence and management of stroke risk factors  
41  
42 such as hypertension, diabetes, and atrial fibrillation<sup>2</sup>, and our observed higher incidence of  
43  
44 stroke/TIA in First Nations people compared to other Ontarians suggests that targeted stroke  
45  
46 prevention strategies, including the identification and modification of vascular risk factors, may  
47  
48 be needed for First Nations groups with diabetes. However, additional factors such as rurality  
49  
50 and socioeconomic status can affect stroke risk, with diabetes mellitus being an important  
51  
52  
53  
54  
55  
56  
57  
58  
59  
60



1  
2  
3 mediator of the association between socioeconomic deprivation and ischemic stroke risk<sup>20,21</sup>. A  
4  
5 focus on the social and Indigenous-specific determinants of health, including the ongoing  
6  
7 impacts of colonization, is also needed to address the health of First Nations people<sup>10,22</sup>. The  
8  
9 finding that stroke incidence was particularly high for younger First Nations people suggests an  
10  
11 urgent need to identify and address the causes of stroke in these younger adults, who may also  
12  
13 have unique rehabilitation and reintegration needs after stroke, and who face reduced  
14  
15 employability and productivity during peak working years<sup>23,24</sup>.  
16  
17  
18  
19  
20  
21

22  
23 In individuals with suspected acute stroke, rapid neuroimaging with computed tomography or  
24  
25 magnetic resonance imaging is recommended to confirm the diagnosis and to determine  
26  
27 whether the stroke is ischemic or hemorrhagic<sup>11,25</sup> and it is reassuring that almost all First  
28  
29 Nations and other Ontarians underwent neuroimaging within 24 hours of presentation to  
30  
31 hospital. However, First Nations people with ischemic stroke were less likely than other  
32  
33 Ontarians to receive thrombolysis, which can improve outcomes after stroke. Our data sources  
34  
35 do not allow us to determine the reasons for this difference, and further research is needed to  
36  
37 understand whether the lower observed rates in First Nations people are due to appropriate  
38  
39 patient selection based on presentation and clinical factors, lack of access to treatment, patient  
40  
41 preferences, or other factors.  
42  
43  
44  
45  
46  
47  
48  
49

50 Inpatient rehabilitation is recommended for people with stroke and residual functional deficits  
51  
52 who are able to participate in a rehabilitation program<sup>26</sup>. In Ontario, overall rates of discharge  
53  
54 to inpatient rehabilitation after acute stroke were similar in First Nations people and others  
55  
56  
57  
58  
59  
60

1  
2  
3 with diabetes. However, our data sources did not have information on functional status after  
4  
5 stroke, and so further work is needed to determine whether rates of discharge to rehabilitation  
6  
7 are appropriate based on the level of disability in each group.  
8  
9

10  
11  
12 Point estimates for age/sex-adjusted mortality at 7, 30 and 365 days after stroke were higher  
13  
14 for First Nations people than for other Ontarians. In analyses stratified by age, the increased  
15  
16 one-year mortality in First Nations people appeared to be primarily attributable to deaths in  
17  
18 those aged under 65 years. This elevated stroke case-fatality, combined with the higher  
19  
20 observed stroke incidence in younger First Nations people, suggests that this represents a  
21  
22 particularly vulnerable subgroup of young people with diabetes susceptible to both incident  
23  
24 stroke and reduced survival after stroke. Targeted strategies are needed to understand and  
25  
26 mitigate post-stroke mortality in this group.  
27  
28  
29  
30  
31  
32  
33  
34

35 A number of study limitations merit comment. Our available data sources did not include  
36  
37 information on many quality indicators of stroke care delivery, such as the use of vascular  
38  
39 imaging, mechanical thrombectomy, stroke unit care, dysphagia screening, and medications for  
40  
41 secondary stroke prevention<sup>27</sup>. The lack of detailed clinical data did not permit an analysis of  
42  
43 the underlying reasons behind the observed lower rates of thrombolysis and carotid  
44  
45 revascularization in First Nations people, or an assessment of the use of rehabilitation services  
46  
47 stratified by disability. We did not have information on stroke severity, which is the strongest  
48  
49 predictor of mortality after stroke, and do not know why mortality rates were particularly high  
50  
51 in younger First Nations people with diabetes. In addition, we did not have information on  
52  
53  
54  
55  
56  
57  
58  
59  
60

1  
2  
3 other important stroke outcomes such as functional status and quality of life<sup>28</sup>. Finally, the  
4  
5 relatively small sample size of First Nations people with stroke may have provided inadequate  
6  
7 power to detect differences in care and outcomes in some subgroups of patients.  
8  
9

10  
11  
12  
13 This study suggests that First Nations people with diabetes are at increased risk of stroke and  
14  
15 death from stroke compared to other Ontarians, and that these risks are particularly high for  
16  
17 younger First Nations people. Multifaceted interventions that address traditional risk factors  
18  
19 along with Indigenous-specific determinants of health are needed to mitigate the risks and  
20  
21 consequences of stroke in First Nations people with diabetes.  
22  
23  
24  
25  
26  
27  
28  
29  
30  
31  
32  
33  
34  
35  
36  
37  
38  
39  
40  
41  
42  
43  
44  
45  
46  
47  
48  
49  
50  
51  
52  
53  
54  
55  
56  
57  
58  
59  
60

Table 1: Baseline characteristics of First Nations people and other Ontarians with diabetes hospitalized with stroke or transient ischemic attack (TIA) in Ontario, April 1, 2011 to March 31, 2016

|                         | First Nations people with diabetes | Other people in Ontario with diabetes | Standardized difference of the mean |
|-------------------------|------------------------------------|---------------------------------------|-------------------------------------|
| N                       | 536                                | 28,338                                |                                     |
| Median age, years (IQR) | 63 (55-71)                         | 74 (65-81)                            | 0.82                                |
| Female sex, n (%)       | 287 (53.5%)                        | 13,274 (46.8%)                        | 0.13                                |
| Age group, n (%)        |                                    |                                       |                                     |
| 0-49                    | 66 (12.3%)                         | 1,065(3.8%)                           | 0.32                                |
| 50-64                   | 231 (43.1%)                        | 5,841 (20.6%)                         | 0.5                                 |
| 65-79                   | 190 (35.4%)                        | 12,564 (44.3%)                        | 0.18                                |
| 80+                     | 49 (9.1%)                          | 8,868 (31.3%)                         | 0.57                                |
| Rurality                |                                    |                                       |                                     |
| Urban                   | 151 (41.7%)                        | 19,265 (68.4%)                        | 0.56                                |
| Semi-urban              | 90 (24.9%)                         | 6,203 (22.0%)                         | 0.07                                |
| Rural                   | 121 (33.4%)                        | 2,680 (9.5%)                          | 0.61                                |
| Comorbidity             |                                    |                                       |                                     |
| Low (0-4 ADGs)          | 67 (12.5%)                         | 3,158 (11.1%)                         | 0.04                                |
| Medium (5-9 ADGs)       | 173 (32.3%)                        | 9,979 (35.2%)                         | 0.06                                |
| High (10+ ADGs)         | 296 (55.2%)                        | 15,201 (53.6%)                        | 0.03                                |
| Stroke type             |                                    |                                       |                                     |
| Hemorrhagic             | 55 (10.3%)                         | 3,203 (11.3%)                         | 0.03                                |
| Ischemic                | 372 (69.4%)                        | 20,854 (73.6%)                        | 0.09                                |
| TIA                     | 109(20.3%)                         | 4,281(15.1%)                          | 0.14                                |

\*\* Suppressed due to cell count < 6 and combined with age group 30 -49

NA – not available

IQR - interquartile range

ADG - aggregated diagnosis group

Figure 1: Age- and sex-standardized rate of acute stroke or transient ischemic attack (TIA) hospitalization and 95% confidence interval (CI) among First Nations people and other people in Ontario, per 100,000 people with diabetes, April 1, 1996 to March 31, 2015

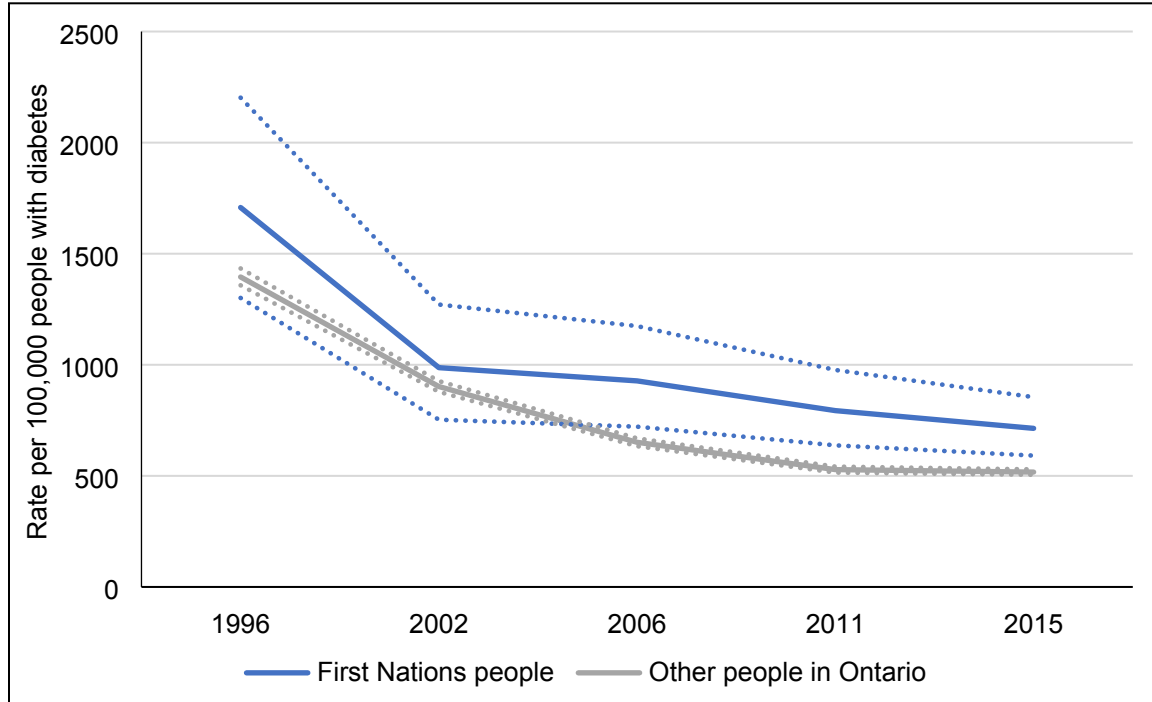

*Dotted lines represent 95% confidence intervals*

1  
2  
3  
4  
5  
6  
7  
8  
9  
10  
11  
12  
13  
14  
15  
16  
17  
18  
19  
20  
21  
22  
23  
24  
25  
26  
27  
28  
29  
30  
31  
32  
33  
34  
35  
36  
37  
38  
39  
40  
41  
42  
43  
44  
45  
46  
47  
48  
49  
50  
51  
52  
53  
54  
55  
56  
57  
58  
59  
60

Figure 2: Crude rate of acute stroke or transient ischemic attack (TIA) hospitalization and 95% confidence intervals among First Nations people and other people in Ontario with diabetes, by age group, April 1, 2015 to March 31, 2016

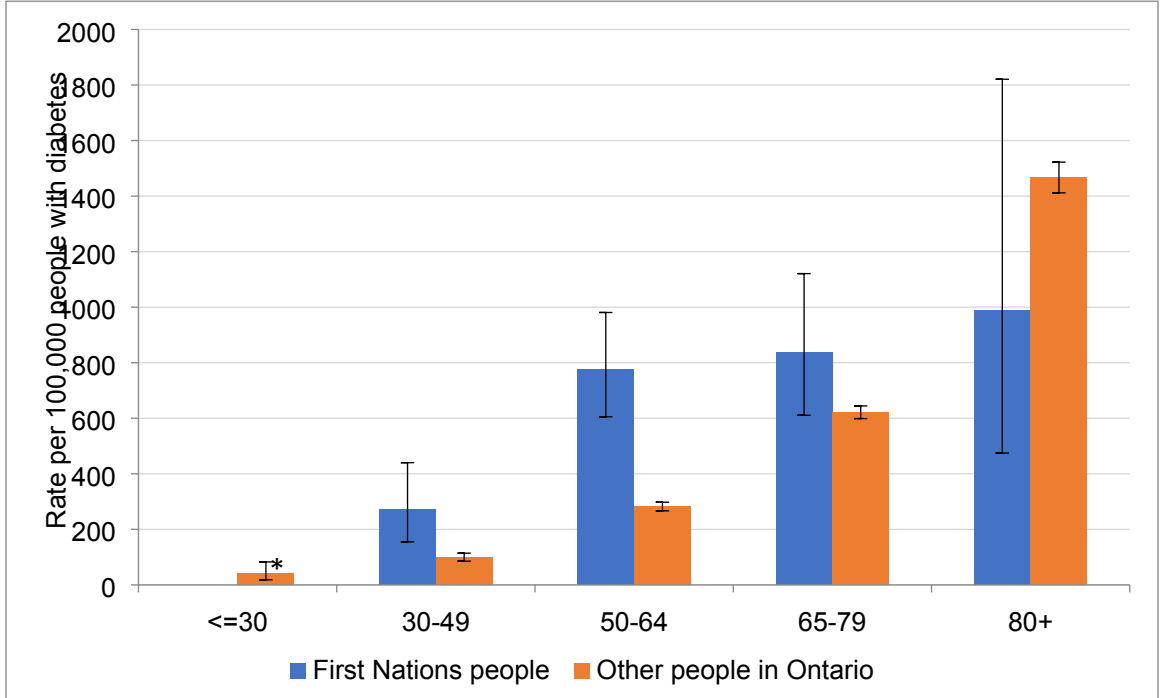

\* data suppressed due to small cell sizes for First Nations people aged <= 30

Figure 3: Age- and sex-standardized rate and 95% confidence interval (CI) of neuro-imaging, thrombolysis, carotid revascularization procedures, and inpatient rehabilitation per 100 persons with event\* among First Nations people and other people in Ontario with diabetes

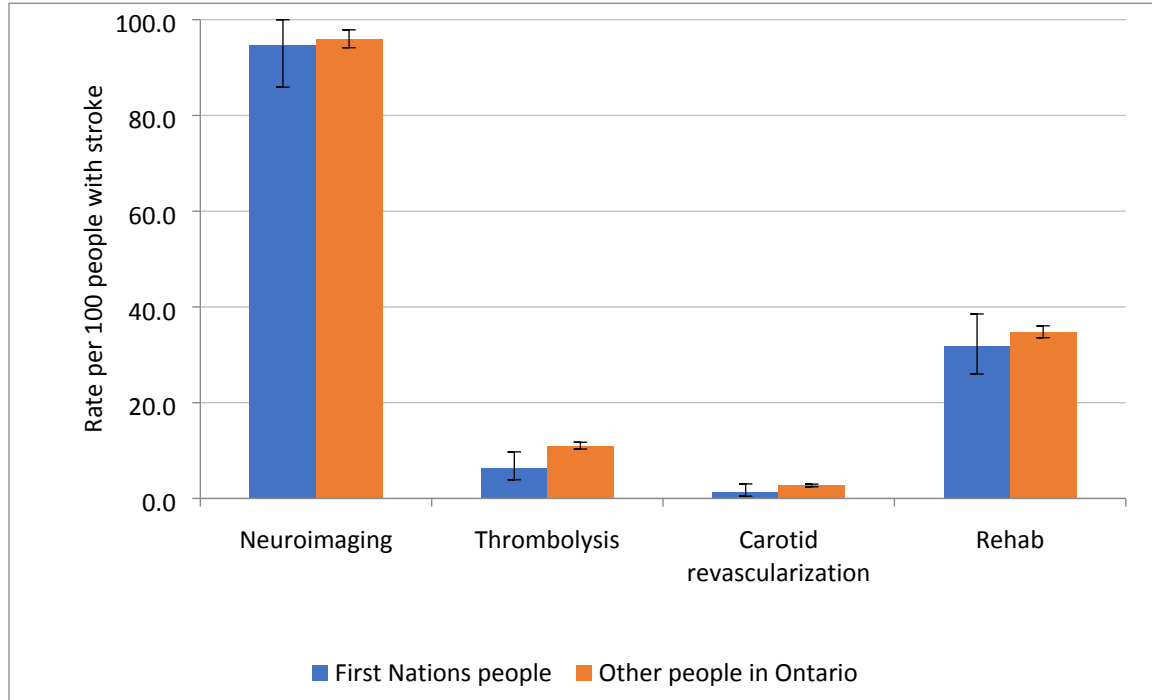

Neuro-imaging included computed tomography or magnetic resonance imaging of the brain in those with acute stroke or TIA between April 1, 2012 and March 31, 2017.

Thrombolysis rates were calculated in those with ischemic strokes between April 1, 2012 and March 31, 2017.

Carotid revascularization rates were calculated in those with ischemic strokes between April 1, 2011 and March 31, 2016 and allowing for 90 days of follow-up.

1  
2  
3  
4  
5  
6  
7  
8  
9  
10  
11  
12  
13  
14  
15  
16  
17  
18  
19  
20  
21  
22  
23  
24  
25  
26  
27  
28  
29  
30  
31  
32  
33  
34  
35  
36  
37  
38  
39  
40  
41  
42  
43  
44  
45  
46  
47  
48  
49  
50  
51  
52  
53  
54  
55  
56  
57  
58  
59  
60

Figure 4a: Seven day, 30-day and 1-year age- and sex-standardized mortality rate and 95% confidence interval (CI) per 100 persons with acute stroke among First Nations people and other people in Ontario with diabetes, April 1, 2011 to March 31, 2016 (with follow-up to March 31, 2017)

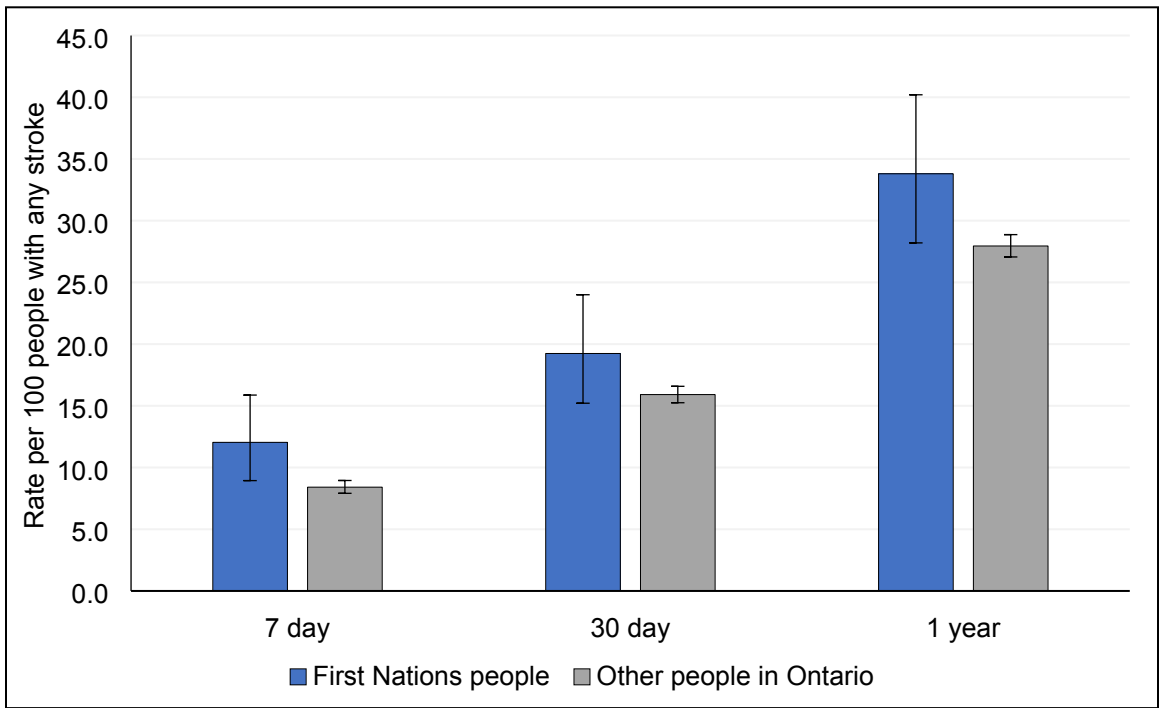



Figure 4b: 1-year crude mortality rate and 95% confidence intervals per 100 persons with acute stroke among First Nations people and other people in Ontario 30 years and older with diabetes, by age group, April 1, 2011 to March 31, 2016 (with follow-up to March 31, 2017)

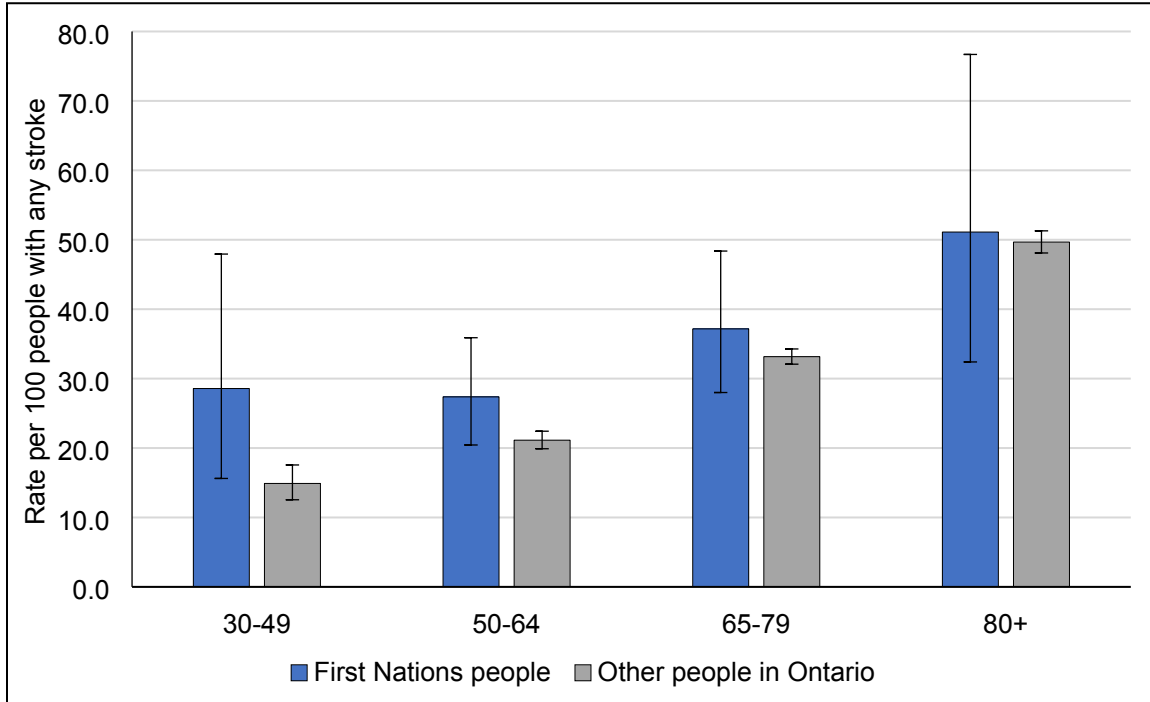

Data for age group < 30 years suppressed due to small numbers

**Acknowledgements:**

Our partners through the early design, implementation and final dissemination of this project were the Chiefs of Ontario. Their many member contributions were key to the content and quality of the project. The authors also acknowledge the members of the Patient Advisory Committee for providing insightful and thoughtful input; their advice made a significant contribution in shaping the work. For a complete listing of the specific members of the Committee, see Green ME, Jones C, Walker JD, et.al; First Nations and Diabetes in Ontario. Toronto, ON: ICES. Forthcoming, 2019. We also wish to acknowledge the First Nations individuals from Big Grassy River, Alderville First Nation, Caldwell First Nation, Six Nations of the Grand River and Moose Cree First Nation living with diabetes who shared their personal experiences.

The opinions, results and conclusions reported in this paper are those of the authors and are independent from the funding sources. No endorsement by ICES or the Ontario MOHLTC is intended or should be inferred. Parts of this material are based on data and/or information compiled and provided by CIHI. However, the analyses, conclusions, opinions and statements expressed in the material are those of the authors, and not necessarily those of CIHI.

## References

1. Benjamin EJ, Blaha MJ, Chiuve SE, et al. Heart Disease and Stroke Statistics-2017 Update: A Report From the American Heart Association. *Circulation*. 2017;135(10):e146-e603.
2. O'Donnell MJ, Xavier D, Liu L, et al. Risk factors for ischaemic and intracerebral haemorrhagic stroke in 22 countries (the INTERSTROKE study): a case-control study. *Lancet*. 2010;376(9735):112-123.
3. Khoury JC, Kleindorfer D, Alwell K, et al. Diabetes mellitus: a risk factor for ischemic stroke in a large biracial population. *Stroke*. 2013;44(6):1500-1504.
4. Lee M, Saver JL, Hong KS, Song S, Chang KH, Ovbiagele B. Effect of pre-diabetes on future risk of stroke: meta-analysis. *BMJ*. 2012;344:e3564.
5. Shah AD, Langenberg C, Rapsomaniki E, et al. Type 2 diabetes and incidence of cardiovascular diseases: a cohort study in 1.9 million people. *Lancet Diabetes Endocrinol*. 2015;3(2):105-113.
6. Turin TC, Saad N, Jun M, et al. Lifetime risk of diabetes among First Nations and non-First Nations people. *CMAJ*. 2016;188(16):1147-1153.
7. Dyck R, Osgood N, Lin TH, Gao A, Stang MR. Epidemiology of diabetes mellitus among First Nations and non-First Nations adults. *CMAJ*. 2010;182(3):249-256.
8. Katzenellenbogen JM, Vos T, Somerford P, Begg S, Semmens JB, Codde JP. Burden of stroke in indigenous Western Australians: a study using data linkage. *Stroke*. 2011;42(6):1515-1521.
9. You J, Condon JR, Zhao Y, Guthridge SL. Stroke incidence and case-fatality among Indigenous and non-Indigenous populations in the Northern Territory of Australia, 1999-2011. *Int J Stroke*. 2015;10(5):716-722.
10. King M, Smith A, Gracey M. Indigenous health part 2: the underlying causes of the health gap. *Lancet*. 2009;374(9683):76-85.
11. Boulanger JM, Lindsay MP, Gubitza G, et al. Canadian Stroke Best Practice Recommendations for Acute Stroke Management: Prehospital, Emergency Department, and Acute Inpatient Stroke Care, 6th Edition, Update 2018. *Int J Stroke*. 2018;13(9):949-984.
12. Wein T, Lindsay MP, Côté R, et al. Canadian stroke best practice recommendations: Secondary prevention of stroke, sixth edition practice guidelines, update 2017. *Int J Stroke*. 2018;13(4):420-443.
13. Slater M, Green ME, Shah B, et al. Reducing the burden of diabetes in First Nations people in Ontario: Methods for a longitudinal population-based cohort study. *CMAJ*. 2019;In press.
14. Kokotailo RA, Hill MD. Coding of stroke and stroke risk factors using international classification of diseases, revisions 9 and 10. *Stroke*. 2005;36(8):1776-1781.
15. Hall RE, Mondor L, Porter J, Fang J, Kapral MK. Accuracy of administrative data for the coding of acute stroke and TIAs. *Canadian Journal of Neurological Sciences*. 2016;18:1-9.
16. Walker J, Lovett R, Kukutai T, Jones C, Henry D. Indigenous health data and the path to healing. *Lancet*. 2017;390(10107):2022-2023.

17. Krishnamurthi RV, Moran AE, Feigin VL, et al. Stroke Prevalence, Mortality and Disability-Adjusted Life Years in Adults Aged 20-64 Years in 1990-2013: Data from the Global Burden of Disease 2013 Study. *Neuroepidemiology*. 2015;45(3):190-202.
18. Feigin VL, Krishnamurthi RV, Parmar P, et al. Update on the Global Burden of Ischemic and Hemorrhagic Stroke in 1990-2013: The GBD 2013 Study. *Neuroepidemiology*. 2015;45(3):161-176.
19. Seminog OO, Scarborough P, Wright FL, Rayner M, Goldacre MJ. Determinants of the decline in mortality from acute stroke in England: linked national database study of 795 869 adults. *BMJ*. 2019;365:l1778.
20. Kapral MK, Austin PC, Jeyakumar G, et al. Rural-Urban Differences in Stroke Risk Factors, Incidence, and Mortality in People With and Without Prior Stroke. *Circ Cardiovasc Qual Outcomes*. 2019;12(2):e004973.
21. Bray BD, Paley L, Hoffman A, et al. Socioeconomic disparities in first stroke incidence, quality of care, and survival: a nationwide registry-based cohort study of 44 million adults in England. *Lancet Public Health*. 2018:e185-e193.
22. Greenwood M, de Leeuw S, Lindsay N. Challenges in health equity for Indigenous peoples in Canada. *Lancet*. 2018;391(10131):1645-1648.
23. Ekker MS, Boot EM, Singhal AB, et al. Epidemiology, aetiology, and management of ischaemic stroke in young adults. *Lancet Neurol*. 2018;17(9):790-801.
24. Vyas MV, Hackam DG, Silver FL, Laporte A, Kapral MK. Lost Productivity in Stroke Survivors: An Econometrics Analysis. *Neuroepidemiology*. 2016;47(3-4):164-170.
25. Wardlaw JM, Seymour J, Cairns J, Keir S, Lewis S, Sandercock P. Immediate computed tomography scanning of acute stroke is cost-effective and improves quality of life. *Stroke*. 2004;35(11):2477-2483.
26. Hebert D, Lindsay MP, McIntyre A, et al. Canadian stroke best practice recommendations: Stroke rehabilitation practice guidelines, update 2015. *Int J Stroke*. 2016;11(4):459-484.
27. Coutts SB, Wein TH, Lindsay MP, et al. Canadian Stroke Best Practice Recommendations: secondary prevention of stroke guidelines, update 2014. *Int J Stroke*. 2015;10(3):282-291.
28. Salinas J, Sprinkhuizen SM, Ackerson T, et al. An International Standard Set of Patient-Centered Outcome Measures After Stroke. *Stroke*. 2016;47(1):180-186.
